# Supplementary material
Source: PubMed Central journal article supplement (PMC7781461)
Supplement: djaa068_supplementary_data.pdf [file djaa068_supplementary_data.pdf]

**Supplementary Table 1.** Age-standardized prostate cancer incidence rates by race/ethnicity, age group and stage at diagnosis in the United States, 2005-2016\*

| Year             | No. of cases | All Stages Incidence (95% CI) | No. of cases | Local Incidence (95% CI) | No. of cases | Regional Incidence (95% CI) | No. of cases | Distant Incidence (95% CI) |
|------------------|--------------|-------------------------------|--------------|--------------------------|--------------|-----------------------------|--------------|----------------------------|
| <b>All Races</b> |              |                               |              |                          |              |                             |              |                            |
| <b>≥50</b>       |              |                               |              |                          |              |                             |              |                            |
| 2005             | 197,223      | 523.9 (521.6 to 526.3)        | 173,766      | 456.4 (454.2 to 458.6)   | 2,258        | 5.7 (5.4 to 5.9)            | 8,034        | 23.1 (22.6 to 23.6)        |
| 2006             | 215,863      | 557.8 (555.4 to 560.2)        | 192,141      | 491.3 (489.1 to 493.6)   | 2,315        | 5.7 (5.5 to 5.9)            | 8,375        | 23.5 (23.0 to 24.0)        |
| 2007             | 229,689      | 573.9 (571.5 to 576.3)        | 204,706      | 506.1 (503.9 to 508.3)   | 2,470        | 5.9 (5.6 to 6.1)            | 8,391        | 22.9 (22.4 to 23.4)        |
| 2008             | 218,296      | 526.6 (524.4 to 528.9)        | 194,455      | 463.9 (461.8 to 466.0)   | 2,419        | 5.5 (5.3 to 5.8)            | 8,435        | 22.4 (21.9 to 22.9)        |
| 2009             | 214,339      | 498.3 (496.2 to 500.5)        | 189,371      | 435.2 (433.2 to 437.2)   | 2,603        | 5.8 (5.6 to 6.0)            | 8,746        | 22.4 (22.0 to 22.9)        |
| 2010             | 207,338      | 468.1 (466.0 to 470.1)        | 182,263      | 406.3 (404.4 to 408.2)   | 2,769        | 6.0 (5.8 to 6.2)            | 9,094        | 22.7 (22.2 to 23.1)        |
| 2011             | 213,051      | 466.3 (464.3 to 468.4)        | 187,352      | 405.1 (403.2 to 407.0)   | 2,819        | 5.9 (5.7 to 6.1)            | 9,552        | 23.1 (22.6 to 23.6)        |
| 2012             | 181,675      | 383.6 (381.8 to 385.4)        | 156,900      | 326.7 (325.0 to 328.3)   | 2,893        | 5.9 (5.7 to 6.2)            | 10,263       | 24.1 (23.6 to 24.6)        |
| 2013             | 178,634      | 366.3 (364.6 to 368.0)        | 151,508      | 305.9 (304.4 to 307.5)   | 3,225        | 6.4 (6.2 to 6.7)            | 11,269       | 25.8 (25.3 to 26.3)        |
| 2014             | 172,603      | 343.2 (341.6 to 344.9)        | 145,570      | 285.2 (283.7 to 286.7)   | 3,618        | 7.0 (6.8 to 7.2)            | 12,186       | 27.0 (26.5 to 27.4)        |
| 2015             | 183,739      | 355.6 (353.9 to 357.3)        | 154,601      | 294.9 (293.4 to 296.4)   | 4,263        | 8.0 (7.8 to 8.3)            | 13,319       | 28.8 (28.3 to 29.3)        |
| 2016             | 186,743      | 352.4 (350.8 to 354.0)        | 150,241      | 279.2 (277.7 to 280.6)   | 4,916        | 9.0 (8.8 to 9.3)            | 14,162       | 29.7 (29.2 to 30.2)        |
| <b>50-74</b>     |              |                               |              |                          |              |                             |              |                            |
| 2005             | 147,123      | 465.9 (463.5 to 468.3)        | 134,462      | 425.1 (422.8 to 427.4)   | 1,959        | 6.0 (5.8 to 6.3)            | 4,284        | 13.7 (13.3 to 14.2)        |
| 2006             | 163,483      | 503.1 (500.6 to 505.6)        | 150,416      | 462.1 (459.7 to 464.5)   | 1,998        | 6.0 (5.7 to 6.3)            | 4,484        | 14.0 (13.6 to 14.4)        |
| 2007             | 176,441      | 523.0 (520.5 to 525.4)        | 162,378      | 480.4 (478.0 to 482.7)   | 2,140        | 6.2 (5.9 to 6.5)            | 4,541        | 13.6 (13.2 to 14.0)        |
| 2008             | 170,912      | 487.5 (485.2 to 489.9)        | 157,116      | 447.4 (445.1 to 449.6)   | 2,136        | 6.0 (5.7 to 6.2)            | 4,564        | 13.2 (12.8 to 13.6)        |
| 2009             | 171,720      | 471.6 (469.3 to 473.8)        | 156,456      | 428.8 (426.6 to 430.9)   | 2,271        | 6.1 (5.9 to 6.4)            | 4,940        | 13.8 (13.4 to 14.2)        |
| 2010             | 166,607      | 442.7 (440.5 to 444.8)        | 151,277      | 401.0 (399.0 to 403.1)   | 2,399        | 6.2 (6.0 to 6.5)            | 5,183        | 14.0 (13.6 to 14.4)        |
| 2011             | 172,628      | 444.4 (442.3 to 446.6)        | 156,555      | 402.2 (400.2 to 404.2)   | 2,434        | 6.1 (5.9 to 6.4)            | 5,488        | 14.4 (14.0 to 14.8)        |
| 2012             | 148,140      | 367.1 (365.2 to 369.0)        | 132,586      | 327.9 (326.2 to 329.7)   | 2,469        | 6.0 (5.8 to 6.3)            | 5,830        | 14.7 (14.3 to 15.1)        |
| 2013             | 145,441      | 349.0 (347.2 to 350.9)        | 128,074      | 306.7 (305.0 to 308.4)   | 2,782        | 6.6 (6.4 to 6.9)            | 6,372        | 15.6 (15.2 to 16.0)        |
| 2014             | 140,688      | 327.1 (325.4 to 328.9)        | 123,154      | 286.0 (284.4 to 287.6)   | 3,100        | 7.1 (6.9 to 7.4)            | 6,998        | 16.4 (16.1 to 16.8)        |
| 2015             | 149,516      | 337.8 (336.0 to 339.5)        | 130,418      | 294.2 (292.6 to 295.9)   | 3,668        | 8.2 (8.0 to 8.5)            | 7,619        | 17.4 (17.0 to 17.8)        |
| 2016             | 151,400      | 333.1 (331.4 to 334.8)        | 126,532      | 278.0 (276.4 to 279.5)   | 4,174        | 9.1 (8.8 to 9.4)            | 8,204        | 18.3 (17.9 to 18.7)        |
| <b>≥75</b>       |              |                               |              |                          |              |                             |              |                            |
| 2005             | 50,100       | 731.7 (725.3 to 738.2)        | 39,304       | 568.7 (563.0 to 574.3)   | 299          | 4.3 (3.9 to 4.9)            | 3,750        | 56.8 (54.9 to 58.6)        |
| 2006             | 52,380       | 753.5 (747.1 to 760.0)        | 41,725       | 595.9 (590.2 to 601.7)   | 317          | 4.6 (4.1 to 5.1)            | 3,891        | 57.6 (55.8 to 59.4)        |

|                    |         |                        |         |                        |       |                  |       |                     |
|--------------------|---------|------------------------|---------|------------------------|-------|------------------|-------|---------------------|
| 2007               | 53,248  | 756.3 (749.9 to 762.8) | 42,328  | 598.2 (592.5 to 603.9) | 330   | 4.7 (4.2 to 5.2) | 3,850 | 55.9 (54.1 to 57.7) |
| 2008               | 47,384  | 666.5 (660.5 to 672.6) | 37,339  | 523.3 (518.0 to 528.6) | 283   | 4.0 (3.5 to 4.5) | 3,871 | 55.4 (53.6 to 57.1) |
| 2009               | 42,619  | 594.2 (588.6 to 599.9) | 32,915  | 458.3 (453.3 to 463.3) | 332   | 4.6 (4.2 to 5.2) | 3,806 | 53.3 (51.6 to 55.0) |
| 2010               | 40,731  | 559.0 (553.5 to 564.4) | 30,986  | 425.3 (420.5 to 430.0) | 370   | 5.1 (4.6 to 5.6) | 3,911 | 53.6 (52.0 to 55.3) |
| 2011               | 40,423  | 544.7 (539.4 to 550.0) | 30,797  | 415.6 (411.0 to 420.3) | 385   | 5.2 (4.7 to 5.7) | 4,064 | 54.4 (52.8 to 56.1) |
| 2012               | 33,535  | 442.8 (438.1 to 447.6) | 24,314  | 322.0 (318.0 to 326.1) | 424   | 5.6 (5.1 to 6.1) | 4,433 | 57.9 (56.2 to 59.6) |
| 2013               | 33,193  | 428.0 (423.4 to 432.7) | 23,434  | 303.2 (299.3 to 307.1) | 443   | 5.7 (5.2 to 6.3) | 4,897 | 62.5 (60.7 to 64.2) |
| 2014               | 31,915  | 400.7 (396.3 to 405.1) | 22,416  | 282.3 (278.6 to 286.0) | 518   | 6.5 (5.9 to 7.1) | 5,188 | 64.6 (62.8 to 66.4) |
| 2015               | 34,223  | 419.5 (415.1 to 424.0) | 24,183  | 297.2 (293.5 to 301.0) | 595   | 7.3 (6.7 to 7.9) | 5,700 | 69.3 (67.5 to 71.1) |
| 2016               | 35,343  | 421.5 (417.1 to 425.9) | 23,709  | 283.4 (279.8 to 287.0) | 742   | 8.8 (8.2 to 9.5) | 5,958 | 70.6 (68.8 to 72.4) |
| Non-Hispanic White |         |                        |         |                        |       |                  |       |                     |
| ≥50                |         |                        |         |                        |       |                  |       |                     |
| 2005               | 152,757 | 502.3 (499.7 to 504.8) | 135,659 | 442.2 (439.8 to 444.5) | 1,741 | 5.5 (5.2 to 5.8) | 5,689 | 20.1 (19.5 to 20.6) |
| 2006               | 167,474 | 538.6 (536.0 to 541.2) | 150,308 | 479.5 (477.1 to 482.0) | 1,779 | 5.5 (5.3 to 5.8) | 5,937 | 20.5 (20.0 to 21.0) |
| 2007               | 176,779 | 552.1 (549.5 to 554.7) | 159,330 | 493.7 (491.2 to 496.1) | 1,913 | 5.7 (5.5 to 6.0) | 5,935 | 20.0 (19.5 to 20.5) |
| 2008               | 165,839 | 503.0 (500.5 to 505.5) | 149,448 | 449.5 (447.2 to 451.8) | 1,850 | 5.4 (5.1 to 5.6) | 5,941 | 19.6 (19.1 to 20.1) |
| 2009               | 159,859 | 470.0 (467.6 to 472.3) | 143,232 | 417.5 (415.3 to 419.7) | 1,955 | 5.6 (5.3 to 5.8) | 6,069 | 19.4 (19.0 to 19.9) |
| 2010               | 153,862 | 441.7 (439.5 to 444.0) | 136,832 | 389.1 (387.0 to 391.2) | 2,054 | 5.7 (5.4 to 5.9) | 6,429 | 20.1 (19.6 to 20.6) |
| 2011               | 157,619 | 441.2 (439.0 to 443.5) | 140,487 | 389.6 (387.5 to 391.7) | 2,150 | 5.8 (5.6 to 6.1) | 6,744 | 20.6 (20.1 to 21.1) |
| 2012               | 131,916 | 358.3 (356.3 to 360.2) | 115,510 | 310.2 (308.4 to 312.1) | 2,175 | 5.8 (5.5 to 6.0) | 7,245 | 21.6 (21.1 to 22.2) |
| 2013               | 129,014 | 342.0 (340.1 to 343.9) | 111,178 | 291.2 (289.4 to 292.9) | 2,409 | 6.3 (6.0 to 6.5) | 7,912 | 23.2 (22.6 to 23.7) |
| 2014               | 124,104 | 321.4 (319.6 to 323.2) | 106,087 | 271.5 (269.8 to 273.1) | 2,709 | 6.9 (6.6 to 7.1) | 8,671 | 24.7 (24.2 to 25.2) |
| 2015               | 131,453 | 333.2 (331.3 to 335.0) | 112,319 | 281.4 (279.7 to 283.1) | 3,141 | 7.8 (7.5 to 8.1) | 9,356 | 26.2 (25.6 to 26.7) |
| 2016               | 132,368 | 328.9 (327.1 to 330.7) | 109,437 | 268.7 (267.0 to 270.3) | 3,672 | 8.9 (8.6 to 9.2) | 9,999 | 27.3 (26.7 to 27.8) |
| 50-74              |         |                        |         |                        |       |                  |       |                     |
| 2005               | 111,933 | 446.7 (444.1 to 449.3) | 103,293 | 411.6 (409.1 to 414.2) | 1,495 | 5.8 (5.5 to 6.1) | 2,774 | 11.2 (10.8 to 11.6) |
| 2006               | 124,762 | 486.4 (483.7 to 489.2) | 115,922 | 451.3 (448.7 to 453.9) | 1,505 | 5.8 (5.5 to 6.1) | 2,900 | 11.5 (11.1 to 11.9) |
| 2007               | 133,878 | 504.5 (501.8 to 507.3) | 124,767 | 469.5 (466.9 to 472.2) | 1,638 | 6.0 (5.7 to 6.3) | 2,929 | 11.2 (10.8 to 11.6) |
| 2008               | 128,104 | 466.8 (464.2 to 469.4) | 119,253 | 433.9 (431.5 to 436.4) | 1,615 | 5.8 (5.5 to 6.1) | 2,920 | 10.8 (10.4 to 11.2) |
| 2009               | 126,435 | 445.3 (442.8 to 447.8) | 116,866 | 411.0 (408.6 to 413.3) | 1,691 | 5.9 (5.6 to 6.2) | 3,167 | 11.4 (11.0 to 11.8) |
| 2010               | 122,060 | 418.2 (415.9 to 420.6) | 112,196 | 383.8 (381.5 to 386.0) | 1,759 | 5.9 (5.6 to 6.2) | 3,393 | 11.8 (11.4 to 12.3) |
| 2011               | 126,167 | 420.9 (418.5 to 423.2) | 116,098 | 386.6 (384.4 to 388.9) | 1,826 | 6.0 (5.7 to 6.3) | 3,578 | 12.1 (11.7 to 12.6) |
| 2012               | 106,098 | 342.1 (340.1 to 344.2) | 96,484  | 310.8 (308.8 to 312.8) | 1,839 | 5.9 (5.6 to 6.1) | 3,759 | 12.3 (11.9 to 12.7) |
| 2013               | 103,661 | 325.5 (323.5 to 327.5) | 92,916  | 291.3 (289.4 to 293.2) | 2,054 | 6.4 (6.2 to 6.7) | 4,100 | 13.1 (12.7 to 13.5) |
| 2014               | 99,450  | 304.5 (302.6 to 306.4) | 88,490  | 270.7 (268.9 to 272.5) | 2,282 | 6.9 (6.6 to 7.2) | 4,564 | 14.1 (13.7 to 14.5) |
| 2015               | 105,179 | 314.5 (312.6 to 316.4) | 93,334  | 278.8 (277.0 to 280.6) | 2,662 | 7.9 (7.6 to 8.2) | 4,912 | 14.9 (14.4 to 15.3) |

|                           |         |                        |        |                        |       |                     |       |                     |
|---------------------------|---------|------------------------|--------|------------------------|-------|---------------------|-------|---------------------|
| 2016                      | 105,640 | 309.6 (307.7 to 311.5) | 90,799 | 265.9 (264.1 to 267.6) | 3,067 | 8.9 (8.6 to 9.2)    | 5,380 | 15.9 (15.5 to 16.4) |
| <b>≥75</b>                |         |                        |        |                        |       |                     |       |                     |
| 2005                      | 40,824  | 701.2 (694.4 to 708.1) | 32,366 | 551.4 (545.4 to 557.5) | 246   | 4.2 (3.7 to 4.8)    | 2,915 | 51.7 (49.9 to 53.7) |
| 2006                      | 42,712  | 725.3 (718.4 to 732.2) | 34,386 | 580.6 (574.5 to 586.8) | 274   | 4.7 (4.1 to 5.3)    | 3,037 | 52.8 (50.9 to 54.7) |
| 2007                      | 42,901  | 722.5 (715.7 to 729.4) | 34,563 | 579.9 (573.8 to 586.1) | 275   | 4.6 (4.1 to 5.2)    | 3,006 | 51.5 (49.6 to 53.3) |
| 2008                      | 37,735  | 632.5 (626.1 to 638.9) | 30,195 | 505.2 (499.5 to 510.9) | 235   | 3.9 (3.5 to 4.5)    | 3,021 | 51.1 (49.3 to 53.0) |
| 2009                      | 33,424  | 558.4 (552.5 to 564.5) | 26,366 | 440.8 (435.5 to 446.1) | 264   | 4.4 (3.9 to 5.0)    | 2,902 | 48.3 (46.6 to 50.1) |
| 2010                      | 31,802  | 525.9 (520.2 to 531.8) | 24,636 | 408.3 (403.2 to 413.5) | 295   | 4.9 (4.3 to 5.5)    | 3,036 | 49.7 (47.9 to 51.5) |
| 2011                      | 31,452  | 514.2 (508.5 to 519.9) | 24,389 | 400.2 (395.2 to 405.3) | 324   | 5.3 (4.7 to 5.9)    | 3,166 | 50.9 (49.1 to 52.7) |
| 2012                      | 25,818  | 416.0 (410.9 to 421.1) | 19,026 | 308.4 (304.0 to 312.8) | 336   | 5.4 (4.8 to 6.0)    | 3,486 | 55.0 (53.2 to 56.9) |
| 2013                      | 25,353  | 401.1 (396.2 to 406.1) | 18,262 | 290.6 (286.4 to 294.9) | 355   | 5.6 (5.1 to 6.2)    | 3,812 | 59.1 (57.2 to 61.0) |
| 2014                      | 24,654  | 381.8 (377.0 to 386.6) | 17,597 | 274.1 (270.1 to 278.2) | 427   | 6.6 (6.0 to 7.2)    | 4,107 | 62.5 (60.6 to 64.5) |
| 2015                      | 26,274  | 400.0 (395.2 to 404.9) | 18,985 | 290.5 (286.4 to 294.7) | 479   | 7.3 (6.6 to 8.0)    | 4,444 | 66.6 (64.6 to 68.6) |
| 2016                      | 26,728  | 398.0 (393.2 to 402.8) | 18,638 | 278.7 (274.8 to 282.8) | 605   | 9.0 (8.3 to 9.7)    | 4,619 | 67.8 (65.9 to 69.8) |
| <b>Non-Hispanic Black</b> |         |                        |        |                        |       |                     |       |                     |
| <b>≥50</b>                |         |                        |        |                        |       |                     |       |                     |
| 2005                      | 25,982  | 803.3 (793.1 to 813.7) | 22,384 | 673.7 (664.5 to 683.0) | 319   | 8.8 (7.8 to 9.9)    | 1,510 | 53.9 (51.1 to 56.9) |
| 2006                      | 27,774  | 823.4 (813.2 to 833.7) | 24,136 | 696.8 (687.6 to 706.1) | 297   | 7.8 (6.9 to 8.8)    | 1,558 | 53.4 (50.6 to 56.3) |
| 2007                      | 29,937  | 851.3 (841.1 to 861.5) | 26,338 | 730.7 (721.4 to 740.0) | 297   | 7.7 (6.8 to 8.7)    | 1,580 | 51.8 (49.1 to 54.6) |
| 2008                      | 29,724  | 804.3 (794.6 to 814.0) | 26,075 | 687.7 (678.9 to 696.6) | 310   | 7.9 (7.0 to 8.8)    | 1,565 | 49.0 (46.4 to 51.7) |
| 2009                      | 30,581  | 788.6 (779.2 to 798.0) | 26,576 | 666.5 (658.1 to 675.1) | 370   | 8.8 (7.9 to 9.8)    | 1,678 | 51.6 (49.0 to 54.3) |
| 2010                      | 29,703  | 731.9 (723.0 to 740.8) | 25,824 | 619.6 (611.7 to 627.7) | 420   | 9.5 (8.6 to 10.5)   | 1,639 | 47.2 (44.8 to 49.8) |
| 2011                      | 30,744  | 725.2 (716.5 to 733.9) | 26,847 | 618.1 (610.2 to 626.0) | 387   | 8.2 (7.3 to 9.1)    | 1,745 | 48.1 (45.7 to 50.6) |
| 2012                      | 27,757  | 625.6 (617.8 to 633.5) | 23,813 | 522.1 (515.1 to 529.2) | 412   | 8.8 (7.9 to 9.7)    | 1,851 | 48.7 (46.4 to 51.2) |
| 2013                      | 27,685  | 600.3 (592.8 to 607.9) | 23,296 | 490.6 (484.0 to 497.4) | 460   | 9.4 (8.5 to 10.3)   | 2,007 | 51.3 (48.9 to 53.8) |
| 2014                      | 27,249  | 562.3 (555.3 to 569.5) | 22,962 | 461.2 (454.9 to 467.5) | 524   | 10.4 (9.4 to 11.3)  | 2,101 | 50.7 (48.4 to 53.1) |
| 2015                      | 28,733  | 572.4 (565.4 to 579.4) | 23,967 | 464.2 (458.0 to 470.4) | 654   | 12.6 (11.6 to 13.7) | 2,376 | 55.6 (53.2 to 58.0) |
| 2016                      | 28,993  | 556.9 (550.1 to 563.7) | 23,460 | 438.0 (432.1 to 443.9) | 718   | 13.3 (12.3 to 14.4) | 2,432 | 54.9 (52.5 to 57.3) |
| <b>50-74</b>              |         |                        |        |                        |       |                     |       |                     |
| 2005                      | 21,301  | 737.1 (727.0 to 747.3) | 18,973 | 654.1 (644.6 to 663.6) | 287   | 9.4 (8.3 to 10.5)   | 978   | 34.8 (32.6 to 37.1) |
| 2006                      | 23,039  | 764.2 (754.1 to 774.3) | 20,632 | 681.9 (672.4 to 691.4) | 278   | 8.8 (7.8 to 10.0)   | 1,050 | 35.7 (33.5 to 38.0) |
| 2007                      | 25,038  | 796.3 (786.3 to 806.5) | 22,652 | 717.8 (708.2 to 727.4) | 270   | 8.3 (7.3 to 9.3)    | 1,076 | 35.0 (32.9 to 37.2) |
| 2008                      | 25,257  | 767.5 (757.8 to 777.2) | 22,767 | 689.3 (680.2 to 698.6) | 279   | 8.3 (7.3 to 9.3)    | 1,094 | 33.9 (31.9 to 36.1) |
| 2009                      | 26,306  | 764.4 (754.9 to 773.9) | 23,521 | 680.6 (671.7 to 689.6) | 340   | 9.5 (8.5 to 10.6)   | 1,128 | 33.4 (31.5 to 35.5) |
| 2010                      | 25,692  | 714.6 (705.6 to 723.6) | 22,936 | 635.3 (626.9 to 643.8) | 380   | 9.9 (8.9 to 11.0)   | 1,167 | 33.4 (31.5 to 35.5) |
| 2011                      | 26,738  | 713.6 (704.8 to 722.5) | 23,909 | 635.8 (627.5 to 644.1) | 362   | 9.1 (8.2 to 10.1)   | 1,260 | 34.7 (32.8 to 36.8) |

|           |        |                           |        |                        |     |                     |       |                        |
|-----------|--------|---------------------------|--------|------------------------|-----|---------------------|-------|------------------------|
| 2012      | 24,319 | 623.1 (615.1 to 631.2)    | 21,420 | 546.4 (538.9 to 554.0) | 372 | 9.1 (8.2 to 10.1)   | 1,344 | 35.5 (33.5 to 37.5)    |
| 2013      | 24,170 | 592.6 (584.9 to 600.3)    | 20,915 | 510.7 (503.6 to 517.8) | 419 | 9.9 (9.0 to 10.9)   | 1,442 | 36.3 (34.4 to 38.3)    |
| 2014      | 24,062 | 566.2 (558.9 to 573.6)    | 20,817 | 488.3 (481.5 to 495.1) | 477 | 10.9 (10.0 to 12.0) | 1,530 | 36.6 (34.7 to 38.5)    |
| 2015      | 25,319 | 574.5 (567.2 to 581.7)    | 21,702 | 490.5 (483.9 to 497.2) | 595 | 13.4 (12.3 to 14.5) | 1,727 | 40.1 (38.2 to 42.1)    |
| 2016      | 25,603 | 561.1 (554.1 to 568.2)    | 21,309 | 465.4 (459.0 to 471.8) | 649 | 14.0 (12.9 to 15.1) | 1,757 | 39.3 (37.4 to 41.2)    |
| $\geq 75$ |        |                           |        |                        |     |                     |       |                        |
| 2005      | 4,681  | 1040.4 (1010.4 to 1071.0) | 3,411  | 743.9 (718.9 to 769.6) | 32  | 6.8 (4.6 to 9.6)    | 532   | 122.5 (112.2 to 133.6) |
| 2006      | 4,735  | 1035.3 (1005.8 to 1065.6) | 3,504  | 750.4 (725.5 to 775.8) | 19  | 4.0 (2.4 to 6.2)    | 508   | 116.8 (106.7 to 127.5) |
| 2007      | 4,899  | 1047.9 (1018.5 to 1077.9) | 3,686  | 776.9 (751.9 to 802.6) | 27  | 5.9 (3.9 to 8.6)    | 504   | 112.0 (102.4 to 122.3) |
| 2008      | 4,467  | 936.0 (908.6 to 964.0)    | 3,308  | 681.9 (658.8 to 705.7) | 31  | 6.4 (4.3 to 9.1)    | 471   | 102.9 (93.7 to 112.7)  |
| 2009      | 4,275  | 875.2 (849.0 to 901.9)    | 3,055  | 616.2 (594.4 to 638.6) | 30  | 6.2 (4.2 to 8.9)    | 550   | 116.5 (106.9 to 126.8) |
| 2010      | 4,011  | 793.8 (769.3 to 818.9)    | 2,888  | 563.6 (543.2 to 584.6) | 40  | 8.0 (5.7 to 10.9)   | 472   | 96.7 (88.1 to 105.9)   |
| 2011      | 4,006  | 766.4 (742.8 to 790.6)    | 2,938  | 554.7 (534.7 to 575.2) | 25  | 4.7 (3.0 to 7.0)    | 485   | 96.1 (87.7 to 105.1)   |
| 2012      | 3,438  | 634.6 (613.5 to 656.2)    | 2,393  | 435.4 (418.1 to 453.2) | 40  | 7.6 (5.4 to 10.3)   | 507   | 96.3 (88.1 to 105.1)   |
| 2013      | 3,515  | 628.1 (607.5 to 639.3)    | 2,381  | 418.9 (402.2 to 436.1) | 41  | 7.3 (5.3 to 10.0)   | 565   | 105.0 (96.5 to 114.0)  |
| 2014      | 3,187  | 548.4 (529.5 to 567.8)    | 2,145  | 364.1 (348.8 to 379.9) | 47  | 8.3 (6.1 to 11.0)   | 571   | 101.3 (93.2 to 110.0)  |
| 2015      | 3,414  | 565.0 (546.1 to 584.3)    | 2,265  | 370.0 (354.9 to 385.6) | 59  | 9.9 (7.5 to 12.7)   | 649   | 110.9 (102.5 to 119.8) |
| 2016      | 3,390  | 541.7 (523.6 to 560.3)    | 2,151  | 340.0 (325.8 to 354.7) | 69  | 11.0 (8.6 to 14.0)  | 675   | 110.7 (102.5 to 119.4) |

\*Abbreviation: *CI*, confidence interval; Rates are per 100,000 men and age-standardized to the 2000 US Standard population

Source: U.S. Cancer Statistics Public Use Research Database, November 2018 submission (2001-2016) [6]

**Supplementary Table 2.** Age-standardized prostate cancer incidence rates by race/ethnicity, extended age groups and stage at diagnosis in the United States, 2005-2016\*

| Year      | All Stages   |                        | Local        |                        | Regional     |                    | Distant      |                    |
|-----------|--------------|------------------------|--------------|------------------------|--------------|--------------------|--------------|--------------------|
|           | No. of cases | Incidence (95% CI)     | No. of cases | Incidence (95% CI)     | No. of cases | Incidence (95% CI) | No. of cases | Incidence (95% CI) |
| All Races |              |                        |              |                        |              |                    |              |                    |
| 20-49     |              |                        |              |                        |              |                    |              |                    |
| 2005      | 5,675        | 8.7 (8.5 to 8.9)       | 5,225        | 8.0 (7.8 to 8.2)       | 90           | 0.1 (0.1 to 0.2)   | 210          | 0.3 (0.3 to 0.4)   |
| 2006      | 6,321        | 9.6 (9.4 to 9.8)       | 5,799        | 8.8 (8.6 to 9.0)       | 113          | 0.2 (0.1 to 0.2)   | 210          | 0.3 (0.3 to 0.4)   |
| 2007      | 6,763        | 10.3 (10.0 to 10.5)    | 6,257        | 9.5 (9.3 to 9.8)       | 101          | 0.2 (0.1 to 0.2)   | 201          | 0.3 (0.3 to 0.4)   |
| 2008      | 6,914        | 10.6 (10.3 to 10.8)    | 6,380        | 9.7 (9.5 to 10.0)      | 124          | 0.2 (0.2 to 0.2)   | 208          | 0.3 (0.3 to 0.4)   |
| 2009      | 6,818        | 10.4 (10.2 to 10.7)    | 6,251        | 9.5 (9.3 to 9.8)       | 131          | 0.2 (0.2 to 0.2)   | 213          | 0.3 (0.3 to 0.4)   |
| 2010      | 6,268        | 9.7 (9.4 to 9.9)       | 5,750        | 8.9 (8.6 to 9.1)       | 99           | 0.2 (0.1 to 0.2)   | 230          | 0.4 (0.3 to 0.4)   |
| 2011      | 6,292        | 9.8 (9.6 to 10.1)      | 5,792        | 9.1 (8.8 to 9.3)       | 93           | 0.1 (0.1 to 0.2)   | 208          | 0.3 (0.3 to 0.4)   |
| 2012      | 5,286        | 8.4 (8.2 to 8.6)       | 4,817        | 7.7 (7.4 to 7.9)       | 101          | 0.2 (0.1 to 0.2)   | 206          | 0.3 (0.3 to 0.4)   |
| 2013      | 4,563        | 7.4 (7.2 to 7.6)       | 4,080        | 6.6 (6.4 to 6.8)       | 100          | 0.2 (0.1 to 0.2)   | 213          | 0.3 (0.3 to 0.4)   |
| 2014      | 4,066        | 6.7 (6.5 to 6.9)       | 3,638        | 6.0 (5.8 to 6.2)       | 113          | 0.2 (0.2 to 0.2)   | 175          | 0.3 (0.2 to 0.3)   |
| 2015      | 3,933        | 6.5 (6.3 to 6.7)       | 3,455        | 5.7 (5.5 to 5.9)       | 110          | 0.2 (0.1 to 0.2)   | 211          | 0.3 (0.3 to 0.4)   |
| 2016      | 3,656        | 6.0 (5.8 to 6.2)       | 3,115        | 5.1 (5.0 to 5.3)       | 104          | 0.2 (0.1 to 0.2)   | 215          | 0.3 (0.3 to 0.4)   |
| 50-54     |              |                        |              |                        |              |                    |              |                    |
| 2005      | 13,486       | 137.3 (135.0 to 139.7) | 12,526       | 127.5 (125.3 to 129.8) | 232          | 2.4 (2.1 to 2.7)   | 357          | 3.6 (3.3 to 4.0)   |
| 2006      | 15,122       | 150.2 (147.9 to 152.7) | 14,086       | 140.0 (137.7 to 142.3) | 244          | 2.4 (2.1 to 2.7)   | 370          | 3.7 (3.3 to 4.1)   |
| 2007      | 16,692       | 161.4 (158.9 to 163.8) | 15,534       | 150.2 (147.8 to 152.5) | 269          | 2.6 (2.3 to 2.9)   | 415          | 4.0 (3.6 to 4.4)   |
| 2008      | 16,523       | 155.9 (153.5 to 158.3) | 15,400       | 145.3 (143.0 to 147.6) | 266          | 2.5 (2.2 to 2.8)   | 396          | 3.7 (3.4 to 4.1)   |
| 2009      | 16,977       | 157.4 (155.1 to 159.8) | 15,693       | 145.5 (143.3 to 147.8) | 270          | 2.5 (2.2 to 2.8)   | 473          | 4.4 (4.0 to 4.8)   |
| 2010      | 15,880       | 144.9 (142.6 to 147.2) | 14,679       | 133.9 (131.8 to 136.1) | 255          | 2.3 (2.0 to 2.6)   | 470          | 4.3 (3.9 to 4.7)   |
| 2011      | 16,514       | 149.2 (146.9 to 151.5) | 15,230       | 137.6 (135.4 to 139.8) | 271          | 2.4 (2.2 to 2.8)   | 500          | 4.5 (4.1 to 4.9)   |
| 2012      | 13,793       | 124.5 (122.4 to 126.6) | 12,633       | 114.0 (112.0 to 116.0) | 265          | 2.4 (2.1 to 2.7)   | 456          | 4.1 (3.7 to 4.5)   |
| 2013      | 12,901       | 116.5 (114.5 to 118.5) | 11,574       | 104.5 (102.6 to 106.4) | 301          | 2.7 (2.4 to 3.0)   | 490          | 4.4 (4.0 to 4.8)   |
| 2014      | 12,116       | 109.5 (107.6 to 111.5) | 10,831       | 97.9 (96.1 to 99.8)    | 278          | 2.5 (2.2 to 2.8)   | 545          | 4.9 (4.5 to 5.4)   |
| 2015      | 12,045       | 110.1 (108.1 to 112.0) | 10,660       | 97.4 (95.6 to 99.3)    | 343          | 3.1 (2.8 to 3.5)   | 565          | 5.2 (4.7 to 5.6)   |
| 2016      | 11,458       | 106.7 (104.8 to 108.7) | 9,771        | 91.0 (89.2 to 92.8)    | 321          | 3.0 (2.7 to 3.3)   | 536          | 5.0 (4.6 to 5.4)   |
| 55-69     |              |                        |              |                        |              |                    |              |                    |

|                    |         |                        |         |                        |       |                     |       |                     |
|--------------------|---------|------------------------|---------|------------------------|-------|---------------------|-------|---------------------|
| 2005               | 98,902  | 522.8 (519.6 to 526.1) | 90,833  | 479.8 (476.7 to 483.0) | 1,435 | 7.5 (7.2 to 7.9)    | 2,772 | 14.7 (14.2 to 15.3) |
| 2006               | 110,967 | 566.6 (563.2 to 569.9) | 102,654 | 523.9 (520.7 to 527.1) | 1,425 | 7.2 (6.8 to 7.6)    | 2,890 | 14.8 (14.3 to 15.4) |
| 2007               | 121,119 | 591.1 (587.8 to 594.5) | 112,022 | 546.3 (543.1 to 549.5) | 1,557 | 7.6 (7.2 to 8.0)    | 2,989 | 14.7 (14.1 to 15.2) |
| 2008               | 117,912 | 550.9 (547.8 to 554.1) | 108,920 | 508.8 (505.7 to 511.8) | 1,533 | 7.1 (6.8 to 7.5)    | 2,998 | 14.0 (13.5 to 14.5) |
| 2009               | 119,349 | 535.2 (532.2 to 538.3) | 109,287 | 489.9 (487.0 to 492.8) | 1,647 | 7.4 (7.0 to 7.7)    | 3,215 | 14.4 (13.9 to 14.9) |
| 2010               | 116,426 | 502.2 (499.3 to 505.1) | 106,278 | 458.3 (455.5 to 461.0) | 1,779 | 7.6 (7.3 to 8.0)    | 3,398 | 14.7 (14.2 to 15.2) |
| 2011               | 120,965 | 504.4 (501.5 to 507.2) | 110,303 | 459.8 (457.1 to 462.5) | 1,796 | 7.4 (7.1 to 7.8)    | 3,618 | 15.1 (14.6 to 15.6) |
| 2012               | 104,515 | 418.7 (416.2 to 421.3) | 93,976  | 376.5 (374.0 to 378.9) | 1,794 | 7.2 (6.8 to 7.5)    | 3,927 | 15.7 (15.2 to 16.2) |
| 2013               | 102,383 | 398.8 (396.3 to 401.2) | 90,836  | 353.8 (351.5 to 356.1) | 1,993 | 7.8 (7.4 to 8.1)    | 4,164 | 16.2 (15.7 to 16.7) |
| 2014               | 99,387  | 375.3 (372.9 to 377.6) | 87,385  | 330.0 (327.8 to 332.1) | 2,272 | 8.6 (8.2 to 8.9)    | 4,724 | 17.8 (17.3 to 18.3) |
| 2015               | 105,683 | 386.5 (384.2 to 388.9) | 92,696  | 339.1 (336.9 to 341.3) | 2,656 | 9.7 (9.3 to 10.1)   | 5,084 | 18.6 (18.1 to 19.1) |
| 2016               | 107,577 | 382.0 (379.7 to 384.2) | 90,524  | 321.4 (319.3 to 323.5) | 3,082 | 10.9 (10.6 to 11.3) | 5,511 | 19.5 (19.0 to 20.1) |
| 70-74              |         |                        |         |                        |       |                     |       |                     |
| 2005               | 34,735  | 896.6 (887.2 to 906.1) | 31,103  | 802.9 (794.0 to 811.8) | 292   | 7.5 (6.7 to 8.5)    | 1,155 | 29.8 (28.1 to 31.6) |
| 2006               | 37,394  | 956.8 (947.1 to 966.5) | 33,676  | 861.6 (852.5 to 870.9) | 329   | 8.4 (7.5 to 9.4)    | 1,224 | 31.3 (29.6 to 33.1) |
| 2007               | 38,630  | 976.1 (966.4 to 985.9) | 34,822  | 879.9 (870.7 to 889.2) | 314   | 7.9 (7.1 to 8.9)    | 1,137 | 28.7 (27.1 to 30.5) |
| 2008               | 36,477  | 899.6 (890.3 to 908.8) | 32,796  | 808.8 (800.1 to 817.6) | 337   | 8.3 (7.4 to 9.2)    | 1,170 | 28.9 (27.2 to 30.6) |
| 2009               | 35,394  | 848.1 (839.3 to 857.0) | 31,476  | 754.2 (745.9 to 762.6) | 354   | 8.5 (7.6 to 9.4)    | 1,252 | 30.0 (28.4 to 31.7) |
| 2010               | 34,301  | 802.7 (794.2 to 811.2) | 30,320  | 709.5 (701.5 to 717.5) | 365   | 8.5 (7.7 to 9.5)    | 1,315 | 30.8 (29.1 to 32.5) |
| 2011               | 35,149  | 798.1 (789.8 to 806.5) | 31,022  | 704.4 (696.6 to 712.3) | 367   | 8.3 (7.5 to 9.2)    | 1,370 | 31.1 (29.5 to 32.8) |
| 2012               | 29,832  | 648.6 (641.3 to 656.0) | 25,977  | 564.8 (557.9 to 571.7) | 410   | 8.9 (8.1 to 9.8)    | 1,447 | 31.5 (29.9 to 33.1) |
| 2013               | 30,157  | 617.9 (610.9 to 624.9) | 25,664  | 525.8 (519.4 to 532.3) | 488   | 10.0 (9.1 to 10.9)  | 1,718 | 35.2 (33.6 to 36.9) |
| 2014               | 29,185  | 572.6 (566.1 to 579.2) | 24,938  | 489.3 (483.3 to 495.4) | 550   | 10.8 (9.9 to 11.7)  | 1,729 | 33.9 (32.3 to 35.6) |
| 2015               | 31,788  | 600.7 (594.1 to 607.4) | 27,062  | 511.4 (505.3 to 517.5) | 669   | 12.6 (11.7 to 13.6) | 1,970 | 37.2 (35.6 to 38.9) |
| 2016               | 32,365  | 593.2 (586.7 to 599.7) | 26,237  | 480.9 (475.1 to 486.7) | 771   | 14.1 (13.2 to 15.2) | 2,157 | 39.5 (37.9 to 41.2) |
| Non-Hispanic White |         |                        |         |                        |       |                     |       |                     |
| 20-49              |         |                        |         |                        |       |                     |       |                     |
| 2005               | 3,696   | 7.9 (7.6 to 8.1)       | 3,440   | 7.3 (7.1 to 7.6)       | 61    | 0.1 (0.1 to 0.2)    | 120   | 0.3 (0.2 to 0.3)    |
| 2006               | 4,140   | 8.9 (8.6 to 9.1)       | 3,828   | 8.2 (7.9 to 8.5)       | 80    | 0.2 (0.1 to 0.2)    | 116   | 0.2 (0.2 to 0.3)    |
| 2007               | 4,329   | 9.4 (9.1 to 9.7)       | 4,070   | 8.8 (8.5 to 9.1)       | 65    | 0.1 (0.1 to 0.2)    | 115   | 0.3 (0.2 to 0.3)    |
| 2008               | 4,445   | 9.7 (9.5 to 10.0)      | 4,137   | 9.1 (8.8 to 9.4)       | 82    | 0.2 (0.1 to 0.2)    | 127   | 0.3 (0.2 to 0.3)    |
| 2009               | 4,248   | 9.5 (9.2 to 9.7)       | 3,922   | 8.7 (8.5 to 9.0)       | 92    | 0.2 (0.2 to 0.3)    | 129   | 0.3 (0.2 to 0.3)    |
| 2010               | 3,734   | 8.5 (8.2 to 8.8)       | 3,470   | 7.9 (7.6 to 8.2)       | 60    | 0.1 (0.1 to 0.2)    | 123   | 0.3 (0.2 to 0.3)    |
| 2011               | 3,797   | 8.9 (8.6 to 9.2)       | 3,514   | 8.2 (7.9 to 8.5)       | 67    | 0.2 (0.1 to 0.2)    | 141   | 0.3 (0.3 to 0.4)    |
| 2012               | 3,036   | 7.3 (7.1 to 7.6)       | 2,805   | 6.8 (6.5 to 7.0)       | 57    | 0.1 (0.1 to 0.2)    | 113   | 0.3 (0.2 to 0.3)    |
| 2013               | 2,574   | 6.5 (6.2 to 6.7)       | 2,349   | 5.9 (5.7 to 6.1)       | 58    | 0.1 (0.1 to 0.2)    | 101   | 0.3 (0.2 to 0.3)    |

|       |        |                        |        |                        |       |                     |       |                     |
|-------|--------|------------------------|--------|------------------------|-------|---------------------|-------|---------------------|
| 2014  | 2,287  | 5.9 (5.6 to 6.1)       | 2,061  | 5.3 (5.1 to 5.5)       | 74    | 0.2 (0.2 to 0.2)    | 95    | 0.2 (0.2 to 0.3)    |
| 2015  | 2,151  | 5.6 (5.4 to 5.9)       | 1,916  | 5.0 (4.8 to 5.2)       | 61    | 0.2 (0.1 to 0.2)    | 111   | 0.3 (0.2 to 0.4)    |
| 2016  | 1,963  | 5.2 (4.9 to 5.4)       | 1,702  | 4.5 (4.3 to 4.7)       | 67    | 0.2 (0.1 to 0.2)    | 107   | 0.3 (0.2 to 0.3)    |
| 50-54 |        |                        |        |                        |       |                     |       |                     |
| 2005  | 9,612  | 130.3 (127.7 to 133.0) | 9,006  | 122.1 (119.6 to 124.7) | 161   | 2.2 (1.9 to 2.5)    | 220   | 3.0 (2.6 to 3.4)    |
| 2006  | 10,902 | 145.3 (142.6 to 148.1) | 10,265 | 136.8 (134.2 to 139.5) | 169   | 2.3 (1.9 to 2.6)    | 222   | 3.0 (2.6 to 3.4)    |
| 2007  | 11,913 | 155.8 (153.0 to 158.6) | 11,205 | 146.5 (143.8 to 149.3) | 189   | 2.5 (2.1 to 2.9)    | 255   | 3.3 (2.9 to 3.8)    |
| 2008  | 11,572 | 149.0 (146.3 to 151.7) | 10,928 | 140.7 (138.0 to 143.3) | 187   | 2.4 (2.1 to 2.8)    | 231   | 3.0 (2.6 to 3.4)    |
| 2009  | 11,629 | 148.4 (145.7 to 151.1) | 10,926 | 139.4 (136.8 to 142.1) | 175   | 2.2 (1.9 to 2.6)    | 253   | 3.2 (2.8 to 3.7)    |
| 2010  | 10,806 | 137.0 (134.4 to 139.6) | 10,115 | 128.2 (125.7 to 130.7) | 169   | 2.1 (1.8 to 2.5)    | 276   | 3.5 (3.1 to 3.9)    |
| 2011  | 11,148 | 140.9 (138.3 to 143.5) | 10,401 | 131.4 (128.9 to 134.0) | 187   | 2.4 (2.0 to 2.7)    | 294   | 3.7 (3.3 to 4.2)    |
| 2012  | 9,065  | 115.5 (113.1 to 117.9) | 8,422  | 107.3 (105.0 to 109.6) | 173   | 2.2 (1.9 to 2.6)    | 265   | 3.4 (3.0 to 3.8)    |
| 2013  | 8,357  | 107.7 (105.4 to 110.1) | 7,610  | 98.1 (95.9 to 100.3)   | 210   | 2.7 (2.4 to 3.1)    | 280   | 3.6 (3.2 to 4.1)    |
| 2014  | 7,726  | 100.8 (98.6 to 103.1)  | 7,010  | 91.5 (89.4 to 93.7)    | 190   | 2.5 (2.1 to 2.9)    | 304   | 4.0 (3.5 to 4.4)    |
| 2015  | 7,511  | 100.3 (98.1 to 102.6)  | 6,760  | 90.3 (88.2 to 92.5)    | 218   | 2.9 (2.5 to 3.3)    | 319   | 4.3 (3.8 to 4.8)    |
| 2016  | 7,077  | 98.0 (95.7 to 100.3)   | 6,191  | 85.7 (83.6 to 87.9)    | 193   | 2.7 (2.3 to 3.1)    | 326   | 4.5 (4.0 to 5.0)    |
| 55-69 |        |                        |        |                        |       |                     |       |                     |
| 2005  | 74,992 | 500.8 (497.2 to 504.4) | 69,532 | 464.1 (460.6 to 467.5) | 1,101 | 7.3 (6.9 to 7.8)    | 1,769 | 11.9 (11.3 to 12.4) |
| 2006  | 84,444 | 547.0 (543.3 to 550.8) | 78,887 | 510.8 (507.2 to 514.4) | 1,071 | 6.9 (6.5 to 7.3)    | 1,850 | 12.1 (11.5 to 12.6) |
| 2007  | 91,922 | 570.4 (566.7 to 574.1) | 86,041 | 533.6 (530.1 to 537.2) | 1,195 | 7.4 (7.0 to 7.8)    | 1,905 | 11.9 (11.3 to 12.4) |
| 2008  | 88,254 | 526.0 (522.5 to 529.5) | 82,531 | 491.8 (488.4 to 495.2) | 1,167 | 6.9 (6.5 to 7.3)    | 1,871 | 11.2 (10.7 to 11.7) |
| 2009  | 88,010 | 505.5 (502.1 to 508.8) | 81,696 | 469.0 (465.8 to 472.3) | 1,238 | 7.1 (6.7 to 7.5)    | 2,041 | 11.7 (11.2 to 12.3) |
| 2010  | 85,192 | 472.9 (469.8 to 476.1) | 78,708 | 436.8 (433.8 to 439.9) | 1,305 | 7.2 (6.8 to 7.6)    | 2,202 | 12.2 (11.7 to 12.8) |
| 2011  | 88,520 | 477.8 (474.7 to 481.0) | 81,888 | 441.9 (438.9 to 445.0) | 1,358 | 7.3 (6.9 to 7.7)    | 2,345 | 12.7 (12.2 to 13.2) |
| 2012  | 74,860 | 390.1 (387.3 to 392.9) | 68,358 | 356.2 (353.6 to 358.9) | 1,347 | 7.0 (6.6 to 7.4)    | 2,478 | 12.9 (12.4 to 13.4) |
| 2013  | 72,610 | 370.5 (367.8 to 373.2) | 65,570 | 334.6 (332.0 to 337.2) | 1,455 | 7.4 (7.1 to 7.8)    | 2,609 | 13.3 (12.8 to 13.8) |
| 2014  | 69,694 | 347.2 (344.6 to 349.8) | 62,323 | 310.5 (308.0 to 312.9) | 1,666 | 8.3 (7.9 to 8.7)    | 3,018 | 15.0 (14.5 to 15.6) |
| 2015  | 73,694 | 357.8 (355.2 to 360.4) | 65,808 | 319.6 (317.1 to 322.0) | 1,914 | 9.3 (8.9 to 9.7)    | 3,191 | 15.5 (14.9 to 16.0) |
| 2016  | 74,306 | 352.3 (349.7 to 354.8) | 64,317 | 305.0 (302.6 to 307.3) | 2,253 | 10.7 (10.2 to 11.1) | 3,515 | 16.6 (16.1 to 17.2) |
| 70-74 |        |                        |        |                        |       |                     |       |                     |
| 2005  | 27,329 | 864.1 (853.8 to 874.4) | 24,755 | 782.7 (773.0 to 792.5) | 233   | 7.4 (6.5 to 8.4)    | 785   | 24.8 (23.1 to 26.6) |
| 2006  | 29,416 | 927.9 (917.3 to 938.6) | 26,770 | 844.4 (834.3 to 854.6) | 265   | 8.4 (7.4 to 9.4)    | 828   | 26.1 (24.4 to 28.0) |
| 2007  | 30,043 | 941.1 (930.5 to 951.8) | 27,521 | 862.1 (851.9 to 872.3) | 254   | 8.0 (7.0 to 9.0)    | 769   | 24.1 (22.4 to 25.9) |
| 2008  | 28,278 | 867.8 (857.8 to 878.0) | 25,794 | 791.6 (782.0 to 801.3) | 261   | 8.0 (7.1 to 9.0)    | 818   | 25.1 (23.4 to 26.9) |
| 2009  | 26,796 | 801.1 (791.5 to 810.7) | 24,244 | 724.8 (715.7 to 734.0) | 278   | 8.3 (7.4 to 9.3)    | 873   | 26.1 (24.4 to 27.9) |
| 2010  | 26,062 | 764.1 (754.8 to 773.4) | 23,373 | 685.3 (676.5 to 694.1) | 285   | 8.4 (7.4 to 9.4)    | 915   | 26.8 (25.1 to 28.6) |

|                           |        |                        |        |                        |     |                     |       |                     |
|---------------------------|--------|------------------------|--------|------------------------|-----|---------------------|-------|---------------------|
| 2011                      | 26,499 | 755.7 (746.6 to 764.8) | 23,809 | 679.0 (670.4 to 687.6) | 281 | 8.0 (7.1 to 9.0)    | 939   | 26.8 (25.1 to 28.5) |
| 2012                      | 22,173 | 606.0 (598.1 to 614.0) | 19,704 | 538.5 (531.0 to 546.1) | 319 | 8.7 (7.8 to 9.7)    | 1,016 | 27.8 (26.1 to 29.5) |
| 2013                      | 22,694 | 583.4 (575.8 to 591.0) | 19,736 | 507.3 (500.3 to 514.5) | 389 | 10.0 (9.0 to 11.0)  | 1,211 | 31.1 (29.4 to 32.9) |
| 2014                      | 22,030 | 543.4 (536.3 to 550.6) | 19,157 | 472.5 (465.9 to 479.3) | 426 | 10.5 (9.5 to 11.6)  | 1,242 | 30.6 (29.0 to 32.4) |
| 2015                      | 23,974 | 571.7 (564.5 to 579.0) | 20,766 | 495.2 (488.5 to 502.0) | 530 | 12.6 (11.6 to 13.8) | 1,402 | 33.4 (31.7 to 35.2) |
| 2016                      | 24,257 | 564.0 (557.0 to 571.2) | 20,291 | 471.8 (465.4 to 478.4) | 621 | 14.4 (13.3 to 15.6) | 1,539 | 35.8 (34.0 to 37.6) |
| <b>Non-Hispanic Black</b> |        |                        |        |                        |     |                     |       |                     |
| <b>20-49</b>              |        |                        |        |                        |     |                     |       |                     |
| 2005                      | 1,416  | 18.9 (17.9 to 19.9)    | 1,289  | 17.2 (16.2 to 18.1)    | 18  | 0.2 (0.1 to 0.4)    | 67    | 0.9 (0.7 to 1.1)    |
| 2006                      | 1,548  | 20.3 (19.3 to 21.3)    | 1,420  | 18.6 (17.6 to 19.6)    | 20  | 0.3 (0.2 to 0.4)    | 69    | 0.9 (0.7 to 1.1)    |
| 2007                      | 1,693  | 22.0 (21.0 to 23.1)    | 1,563  | 20.3 (19.3 to 21.4)    | 23  | 0.3 (0.2 to 0.5)    | 62    | 0.8 (0.6 to 1.0)    |
| 2008                      | 1,698  | 22.1 (21.1 to 23.1)    | 1,555  | 20.3 (19.3 to 21.3)    | 30  | 0.4 (0.3 to 0.6)    | 56    | 0.7 (0.5 to 0.9)    |
| 2009                      | 1,783  | 23.1 (21.1 to 23.2)    | 1,641  | 21.3 (20.2 to 22.3)    | 30  | 0.4 (0.3 to 0.5)    | 57    | 0.7 (0.6 to 1.0)    |
| 2010                      | 1,756  | 22.7 (21.7 to 23.8)    | 1,609  | 20.8 (19.8 to 21.9)    | 24  | 0.3 (0.2 to 0.5)    | 67    | 0.9 (0.7 to 1.1)    |
| 2011                      | 1,663  | 21.7 (20.7 to 22.8)    | 1,541  | 20.1 (19.1 to 21.1)    | —   | —                   | 46    | 0.6 (0.4 to 0.8)    |
| 2012                      | 1,537  | 20.2 (19.2 to 21.3)    | 1,396  | 18.4 (17.4 to 19.4)    | 32  | 0.4 (0.3 to 0.6)    | 57    | 0.7 (0.6 to 1.0)    |
| 2013                      | 1,324  | 17.7 (16.8 to 18.7)    | 1,192  | 16.0 (15.1 to 16.9)    | 18  | 0.2 (0.1 to 0.4)    | 70    | 0.9 (0.7 to 1.2)    |
| 2014                      | 1,215  | 16.5 (15.6 to 17.5)    | 1,084  | 14.7 (13.9 to 15.6)    | 27  | 0.4 (0.2 to 0.5)    | 57    | 0.8 (0.6 to 1.0)    |
| 2015                      | 1,204  | 16.5 (15.6 to 17.5)    | 1,081  | 14.8 (13.9 to 15.7)    | 31  | 0.4 (0.3 to 0.6)    | 57    | 0.8 (0.6 to 1.0)    |
| 2016                      | 1,184  | 16.2 (15.3 to 17.2)    | 1,024  | 14.0 (13.2 to 14.9)    | 24  | 0.3 (0.2 to 0.5)    | 73    | 1.0 (0.8 to 1.2)    |
| <b>50-54</b>              |        |                        |        |                        |     |                     |       |                     |
| 2005                      | 2,590  | 245.7 (236.3 to 255.4) | 2,363  | 224.2 (215.2 to 233.4) | 48  | 4.6 (3.4 to 6.0)    | 95    | 9.0 (7.3 to 11.0)   |
| 2006                      | 2,814  | 257.4 (248.0 to 267.1) | 2,568  | 234.9 (225.9 to 244.2) | 47  | 4.3 (3.2 to 5.7)    | 109   | 10.0 (8.2 to 12.0)  |
| 2007                      | 3,171  | 277.1 (267.5 to 286.9) | 2,919  | 255.1 (245.9 to 264.5) | 49  | 4.3 (3.2 to 5.7)    | 112   | 9.8 (8.1 to 11.8)   |
| 2008                      | 3,258  | 273.5 (264.2 to 283.1) | 2,980  | 250.2 (241.3 to 259.3) | 46  | 3.9 (2.8 to 5.2)    | 119   | 10.0 (8.3 to 12.0)  |
| 2009                      | 3,502  | 284.8 (275.5 to 294.4) | 3,175  | 258.2 (249.3 to 267.4) | 72  | 5.9 (4.6 to 7.4)    | 136   | 11.1 (9.3 to 13.1)  |
| 2010                      | 3,346  | 264.3 (255.4 to 273.4) | 3,047  | 240.7 (232.2 to 249.2) | 62  | 4.9 (3.8 to 6.3)    | 128   | 10.1 (8.4 to 12.0)  |
| 2011                      | 3,515  | 274.0 (265.1 to 283.3) | 3,221  | 251.1 (242.5 to 259.9) | 54  | 4.2 (3.2 to 5.5)    | 146   | 11.4 (9.6 to 13.4)  |
| 2012                      | 3,099  | 240.5 (232.1 to 249.1) | 2,797  | 217.1 (209.1 to 225.3) | 65  | 5.0 (3.9 to 6.4)    | 133   | 10.3 (8.6 to 12.2)  |
| 2013                      | 2,935  | 226.8 (218.6 to 235.1) | 2,628  | 203.0 (195.4 to 211.0) | 57  | 4.4 (3.3 to 5.7)    | 135   | 10.4 (8.7 to 12.3)  |
| 2014                      | 2,840  | 218.9 (211.0 to 227.1) | 2,516  | 194.0 (186.5 to 201.7) | 59  | 4.5 (3.5 to 5.9)    | 152   | 11.7 (9.9 to 13.7)  |
| 2015                      | 2,925  | 226.6 (218.4 to 234.9) | 2,565  | 198.7 (191.1 to 206.5) | 82  | 6.4 (5.1 to 7.9)    | 156   | 12.1 (10.3 to 14.1) |
| 2016                      | 2,800  | 218.9 (210.9 to 227.2) | 2,407  | 188.2 (180.8 to 195.9) | 85  | 6.6 (5.3 to 8.2)    | 135   | 10.6 (8.9 to 12.5)  |
| <b>55-69</b>              |        |                        |        |                        |     |                     |       |                     |
| 2005                      | 14,595 | 843.9 (830.2 to 857.8) | 13,078 | 755.6 (742.6 to 768.8) | 203 | 11.3 (9.8 to 13.0)  | 654   | 38.3 (35.4 to 41.3) |
| 2006                      | 15,994 | 885.9 (872.1 to 899.9) | 14,401 | 796.9 (783.8 to 810.1) | 196 | 10.7 (9.2 to 12.3)  | 702   | 39.1 (36.2 to 42.1) |



|       |        |                           |        |                            |     |                     |       |                     |
|-------|--------|---------------------------|--------|----------------------------|-----|---------------------|-------|---------------------|
| 2007  | 17,429 | 923.4 (909.6 to 937.4)    | 15,837 | 837.8 (824.6 to 851.1)     | 195 | 10.4 (9.0 to 12.0)  | 742   | 39.6 (36.8 to 42.6) |
| 2008  | 17,757 | 896.4 (883.1 to 909.8)    | 16,086 | 811.2 (798.6 to 824.0)     | 194 | 9.7 (8.4 to 11.2)   | 749   | 37.8 (35.1 to 40.6) |
| 2009  | 18,478 | 885.5 (872.6 to 898.5)    | 16,607 | 794.6 (782.4 to 806.9)     | 223 | 10.5 (9.2 to 12.0)  | 773   | 37.2 (34.6 to 40.0) |
| 2010  | 18,197 | 829.3 (817.1 to 841.6)    | 16,320 | 743.1 (731.6 to 754.8)     | 286 | 12.8 (11.3 to 14.4) | 789   | 35.9 (33.4 to 38.5) |
| 2011  | 18,972 | 823.8 (812.0 to 835.8)    | 17,004 | 737.7 (726.5 to 749.0)     | 273 | 11.6 (10.2 to 13.0) | 850   | 37.0 (34.6 to 39.7) |
| 2012  | 17,398 | 721.5 (710.7 to 732.4)    | 15,398 | 638.1 (628.0 to 648.4)     | 262 | 10.5 (9.3 to 11.9)  | 947   | 39.6 (37.1 to 42.2) |
| 2013  | 17,561 | 696.2 (685.9 to 706.6)    | 15,255 | 604.8 (595.2 to 614.6)     | 315 | 12.3 (10.9 to 13.7) | 1,011 | 39.8 (37.4 to 42.4) |
| 2014  | 17,588 | 666.0 (656.1 to 676.0)    | 15,269 | 578.0 (568.8 to 587.3)     | 360 | 13.5 (12.1 to 14.9) | 1,096 | 41.3 (38.9 to 43.8) |
| 2015  | 18,554 | 673.3 (663.6 to 683.1)    | 15,983 | 579.7 (570.7 to 588.8)     | 435 | 15.8 (14.3 to 17.3) | 1,230 | 44.5 (42.1 to 47.1) |
| 2016  | 18,968 | 661.8 (652.3 to 671.3)    | 15,855 | 553.2 (544.6 to 561.9)     | 486 | 16.8 (15.4 to 18.4) | 1,292 | 45.2 (42.7 to 47.7) |
| 70-74 |        |                           |        |                            |     |                     |       |                     |
| 2005  | 4,116  | 1298.6 (1259.2 to 1338.9) | 3,532  | 1114.30 (1077.9 to 1151.7) | 36  | 11.4 (8.0 to 15.7)  | 229   | 72.2 (63.2 to 82.2) |
| 2006  | 4,231  | 1298.7 (1259.9 to 1338.5) | 3,663  | 1124.4 (1088.3 to 1161.4)  | 35  | 10.7 (7.5 to 14.9)  | 239   | 73.4 (64.4 to 83.3) |
| 2007  | 4,438  | 1335.1 (1296.1 to 1375.0) | 3,896  | 1172.1 (1135.6 to 1209.5)  | 26  | 7.8 (5.1 to 11.5)   | 222   | 66.8 (58.3 to 76.2) |
| 2008  | 4,242  | 1249.4 (1212.1 to 1287.6) | 3,701  | 1090.0 (1055.2 to 1125.7)  | 39  | 11.5 (8.2 to 15.7)  | 226   | 66.6 (58.2 to 75.8) |
| 2009  | 4,326  | 1247.8 (1210.9 to 1285.5) | 3,739  | 1078.5 (1044.2 to 1113.6)  | 45  | 13.0 (9.5 to 17.4)  | 219   | 63.2 (55.1 to 72.1) |
| 2010  | 4,149  | 1164.6 (1129.5 to 1200.6) | 3,569  | 1001.8 (969.2 to 1035.2)   | 32  | 9.0 (6.1 to 12.7)   | 250   | 70.2 (61.7 to 79.4) |
| 2011  | 4,251  | 1160.0 (1125.4 to 1200.6) | 3,684  | 1005.3 (973.1 to 1038.3)   | 35  | 9.6 (6.7 to 13.3)   | 264   | 72.0 (63.6 to 81.3) |
| 2012  | 3,822  | 1002.0 (970.5 to 1034.3)  | 3,225  | 845.5 (816.6 to 875.2)     | 45  | 11.8 (8.6 to 15.8)  | 264   | 69.2 (61.1 to 78.1) |
| 2013  | 3,674  | 918.4 (888.9 to 948.6)    | 3,032  | 757.9 (731.2 to 785.4)     | 47  | 11.7 (8.6 to 15.6)  | 296   | 74.0 (65.8 to 82.9) |
| 2014  | 3,634  | 870.3 (842.2 to 899.0)    | 3,032  | 726.1 (700.5 to 752.4)     | 58  | 13.9 (10.5 to 18.0) | 282   | 67.5 (59.9 to 75.9) |
| 2015  | 3,840  | 883.2 (855.5 to 911.6)    | 3,154  | 725.4 (700.3 to 751.2)     | 78  | 17.9 (14.2 to 22.4) | 341   | 78.4 (70.3 to 87.2) |
| 2016  | 3,835  | 851.7 (824.9 to 879.1)    | 3,047  | 676.7 (652.9 to 701.1)     | 78  | 17.3 (13.7 to 21.6) | 330   | 73.3 (65.6 to 81.6) |

\*Abbreviation: *CI*, confidence interval; — Statistic could not be calculated due to less than 16 cases.

Source: U.S. Cancer Statistics Public Use Research Database, November 2018 submission (2001-2016) [6]

**Supplementary Table 3.** Trends in annual age-standardized prostate cancer incidence rates for all races combined by stage at diagnosis and extended age groups in the United States, 2005-2016\*

|          |       | Trends 2005-2016 |                     |         |              |                      |         |              |                        |         |
|----------|-------|------------------|---------------------|---------|--------------|----------------------|---------|--------------|------------------------|---------|
| Stage    | Age   | 1st Segment*     |                     |         | 2nd Segment* |                      |         | 3rd Segment* |                        |         |
|          |       | Years            | AAPC (95% CI)       | P-value | Years        | AAPC (95% CI)        | P-value | Years        | AAPC (95% CI)          | P-value |
| Local    | 20-49 | 2005-2007        | 10.3† (0.8 to 20.7) | 0.04    | 2007-2011    | -2.3 (-6.2 to 1.7)   | 0.18    | 2011-2016    | -11.2† (-13.6 to -8.7) | <0.001  |
|          | 50-54 | 2005-2008        | 5.8 (-1.6 to 13.7)  | 0.11    | 2008-2016    | -6.6† (-8.2 to -5.0) | <0.001  |              |                        |         |
|          | 55-69 | 2005-2007        | 6.6 (-10.5 to 27.0) | 0.41    | 2007-2016    | -6.2† (-7.7 to -4.7) | <0.001  |              |                        |         |
|          | 70-74 | 2005-2007        | 3.8 (-14.0 to 25.4) | 0.65    | 2007-2016    | -7.0† (-8.7 to -5.3) | <0.001  |              |                        |         |
| Regional | 20-49 | 2005-2016        | 1.5 (-0.7 to 3.7)   | 0.16    |              |                      |         |              |                        |         |
|          | 50-54 | 2005-2012        | -0.4 (-2.7 to 1.9)  | 0.67    | 2012-2016    | 6.8† (0.3 to 13.7)   | 0.04    |              |                        |         |
|          | 55-69 | 2005-2012        | -0.5 (-1.5 to 0.6)  | 0.35    | 2012-2016    | 10.4† (8.2 to 12.7)  | <0.001  |              |                        |         |
|          | 70-74 | 2005-2012        | 1.7† (0.3 to 3.2)   | 0.03    | 2012-2016    | 12.6† (9.4 to 15.8)  | <0.001  |              |                        |         |
| Distant  | 20-49 | 2005-2016        | 0.6 (-0.4 to 1.7)   | 0.21    |              |                      |         |              |                        |         |
|          | 50-54 | 2005-2016        | 3.1† (2.1 to 4.2)   | <0.001  |              |                      |         |              |                        |         |
|          | 55-69 | 2005-2010        | -0.6 (-2.0 to 0.8)  | 0.35    | 2010-2016    | 5.3† (4.3 to 6.2)    | <0.001  |              |                        |         |
|          | 70-74 | 2005-2011        | 0.5 (-1.8 to 2.8)   | 0.62    | 2011-2016    | 5.1† (2.4 to 7.8)    | 0.003   |              |                        |         |
| Unknown  | 20-49 | 2005-2016        | 2.0 (-1.0 to 5.1)   | 0.17    |              |                      |         |              |                        |         |
|          | 50-54 | 2005-2016        | 3.1 (-0.1 to 6.3)   | 0.06    |              |                      |         |              |                        |         |

|     |       |           |                     |      |           |                       |        |           |                     |
|-----|-------|-----------|---------------------|------|-----------|-----------------------|--------|-----------|---------------------|
|     | 54    |           | 6.5)                |      |           |                       |        |           |                     |
|     | 55-69 | 2005-2014 | -1.3 (-3.2 to 0.6)  | 0.15 | 2014-2016 | 20.2 (-0.7 to 45.6)   | 0.06   |           |                     |
|     | 70-74 | 2005-2016 | -1.8 (-4.2 to 0.6)  | 0.13 |           |                       |        |           |                     |
| All | 20-49 | 2005-2009 | 4.7† (0.8 to 8.7)   | 0.03 | 2009-2016 | -8.4† (-10.2 to -6.5) | <0.001 |           |                     |
|     | 50-54 | 2005-2008 | 5.2 (-2.3 to 13.2)  | 0.15 | 2008-2016 | -5.7† (-7.3 to -4.1)  | <0.001 |           |                     |
|     | 55-69 | 2005-2007 | 5.6 (-12.3 to 27.2) | 0.51 | 2007-2016 | -5.4† (-6.9 to -3.8)  | <0.001 |           |                     |
|     | 70-74 | 2005-2007 | 4.8 (-13.6 to 27.0) | 0.54 | 2007-2014 | -7.3† (-10.4 to -4.0) | 0.004  | 2014-2016 | 1.2 (-17.7 to 24.3) |
|     |       |           |                     |      |           |                       |        |           | 0.88                |

\*Abbreviation: *AAPC*, annual percent change; *CI*, confidence interval; \* Segments determined through joinpoint modeling; † The *AAPC* has a p-value of <0.05

Source: U.S. Cancer Statistics Public Use Research Database, November 2018 submission (2001-2016) [6]

**Supplementary Table 4.** Observed versus expected cases for distant-stage prostate cancer by year, men  $\geq 50$  years\*

| Year         | Observed Count | Expected Count (2008 rate) | Excess (Observed-Expected) | 95% CI         |
|--------------|----------------|----------------------------|----------------------------|----------------|
| 2009         | 8746           | 8745                       | 1                          | (-378 to 366)  |
| 2010         | 9094           | 8996                       | 98                         | (-292 to 472)  |
| 2011         | 9552           | 9245                       | 307                        | (-94 to 692)   |
| 2012         | 10263          | 9509                       | 754                        | (343 to 1150)  |
| 2013         | 11269          | 9777                       | 1492                       | (1069 to 1899) |
| 2014         | 12,186         | 10,046                     | 2140                       | (1706 to 2557) |
| 2015         | 13,319         | 10,314                     | 3005                       | (2559 to 3433) |
| 2016         | 14,162         | 10,572                     | 3590                       | (3134 to 4029) |
| <b>Total</b> |                |                            | 11387                      |                |

\*Abbreviation: *CI*, confidence interval; calculated as the differences between observed cases and expected cases if the rate for distant-stage disease had remained at its lowest level (2008 rate).

Source: U.S. Cancer Statistics Public Use Research Database, November 2018 submission (2001-2016) [6]

**Supplementary Table 5.** Observed versus expected cases for local-stage prostate cancer by year, men  $\geq 50$  years\*

| Year         | Observed Count | Expected Count (2007 rate) | Excess (Expected-Observed) | 95% CI             |
|--------------|----------------|----------------------------|----------------------------|--------------------|
| 2008         | 194,455        | 211,297                    | 16,842                     | 15,078 to 18,618   |
| 2009         | 189,371        | 217,819                    | 28,448                     | 26,633 to 30,276   |
| 2010         | 182,263        | 224,682                    | 42,419                     | 40,549 to 44,302   |
| 2011         | 187,352        | 231,305                    | 43,953                     | 42,031 to 45,889   |
| 2012         | 156,900        | 238,134                    | 81,234                     | 79,258 to 83,225   |
| 2013         | 151,508        | 245,073                    | 93,565                     | 91,533 to 95,611   |
| 2014         | 145,570        | 252,215                    | 106,645                    | 104,557 to 108,747 |
| 2015         | 154,601        | 259,168                    | 104,567                    | 102,426 to 106,724 |
| 2016         | 150,241        | 265,679                    | 115,438                    | 113,246 to 117,645 |
| <b>Total</b> |                |                            | 633,111                    |                    |

\*Abbreviation: *CI*, confidence interval; calculated as the differences between observed cases and expected cases if the rate for early-stage disease had remained at the peak rate (2007 rate).

Source: U.S. Cancer Statistics Public Use Research Database, November 2018 submission (2001-2016) [6]

**Supplementary Table 6.** Non-Hispanic blacks to non-Hispanic whites incidence rate ratios for in distant-stage prostate cancer by age and two-year periods, 2005-2016\*

| Age Group   | Years     | Incidence Ratio | 95% CI       |
|-------------|-----------|-----------------|--------------|
| 20-49 years | 2005-2006 | 3.55            | 2.85 to 4.40 |
|             | 2007-2008 | 2.87            | 2.28 to 3.59 |
|             | 2009-2010 | 2.80            | 2.24 to 3.49 |
|             | 2011-2012 | 2.22            | 1.75 to 2.81 |
|             | 2013-2014 | 3.48            | 2.76 to 4.37 |
|             | 2015-2016 | 3.11            | 2.48 to 3.88 |
| 50-74 years | 2005-2006 | 3.11            | 2.95 to 3.27 |
|             | 2007-2008 | 3.13            | 2.97 to 3.29 |
|             | 2009-2010 | 2.88            | 2.74 to 3.02 |
|             | 2011-2012 | 2.87            | 2.74 to 3.00 |
|             | 2013-2014 | 2.68            | 2.56 to 2.79 |
|             | 2015-2016 | 2.58            | 2.48 to 2.68 |
| ≥75 years   | 2005-2006 | 2.29            | 2.14 to 2.45 |
|             | 2007-2008 | 2.09            | 1.95 to 2.24 |
|             | 2009-2010 | 2.17            | 2.03 to 2.32 |
|             | 2011-2012 | 1.82            | 1.70 to 1.94 |
|             | 2013-2014 | 1.70            | 1.59 to 1.80 |
|             | 2015-2016 | 1.65            | 1.55 to 1.75 |

\*Abbreviation: *CI*, confidence interval

Source: U.S. Cancer Statistics Public Use Research Database, November 2018 submission (2001-2016) [6]

**Supplementary Table 7.** Median PSA-level at diagnosis for regional- or distant-stage disease

for men  $\geq 50$  years, 2005-2016

| Year | Median PSA |
|------|------------|
| 2005 | 61.2       |
| 2006 | 52.0       |
| 2007 | 55.4       |
| 2008 | 60.1       |
| 2009 | 60.2       |
| 2010 | 61.8       |
| 2011 | 67.1       |
| 2012 | 69.9       |
| 2013 | 74.4       |
| 2014 | 65.9       |
| 2015 | 58.0       |
| 2016 | 56.8       |

Source: SEER\*Stat Database: Incidence – SEER 18 Regs Research Data + Hurricane Katrina

Impacted Louisiana Cases, Nov 2018 sub (1975-2016 varying) [11]
